# Supplementary material for: A dynamic nomogram for predicting 28-day mortality in septic shock: a Chinese retrospective cohort study
Source: PeerJ journal article supplement (doi:10.7717/peerj.16723), 2024-01-23
Supplement: Data.xlsx [file Data.xlsx]

## Sheet: Raw data
For sex, 0 represents male, 1 represents female; for other variables, 0 represents response "no", 1 represents response "yes".
Sex	Age	BMI	Hypertension	ChronicLungDis	Diabetes	ChronicKidneyDis	HeartDisease	ChronicLiverDis	Cardiovascular	ChronicBronch	Hypertension2	Diabetes2	Malignancy	CoronaryDisease	Dyslipidemia	DiastolicHF	AtrialFib	ChronicLiverDis2	SystolicHF	COPD	Cerebrovascular	EndStageRDis	PerVascular	SBP	DBP	HeartRate	Respiration	Temperature	UrineVolume	ComaLevel	GCS	Respiration2	Nerve	Cardiovascular2	Liver	Coagulation	Kidney	SOFA	APACHE	HB	RBC	PLT	NEUT	LYM	HCT	ALT	AST	TBIL	ALB
0	30	24.5	0	0	0	0	0	0	0	0	0	0	0	0	0	0	0	0	0	0	0	0	0	89	45	105	16	36.9	1050	1	15	4	0	4	2	2	1	13	26	79	2.88	160	23.8	0.84	0.238	170	88	256.9	36.2
1	24	19.95	0	0	0	0	0	0	0	0	0	0	0	0	0	0	0	0	0	0	0	0	0	81	52	110	18	37.9	2250	1	15	2	0	1	1	1	1	6	2	109.5	3.67	242.5	2.56	1.62	0.33	9	14	8.73	27.2
0	66	25.49	0	0	0	0	0	0	0	0	0	0	1	0	0	0	0	0	0	0	0	0	0	242	119	84	20	36.9	2300	1	15	4	1	2	1	1	1	10	9	105	3.11	96.67	11.69	0.6	0.321	20	19	79.7	21.7
0	69	22.96	1	0	0	0	0	0	0	0	1	0	0	0	0	0	0	0	0	0	0	0	0	125	67	76	19	36.5	3440	1	15	4	0	2	0	1	1	8	8	93	2.78	121.33	6.86	0.68	0.286	75	31	34.5	35.6
0	36	27.78	0	0	0	0	0	0	0	0	0	0	0	0	1	0	0	0	0	0	0	0	0	135	70	100	25	38.7	310	1	15	2	0	2	1	1	1	7	11	130	3.45	159.33	5.78	1.22	0.397	14	32	75.6	28.9
0	47	23.66	1	0	0	0	0	0	0	0	1	0	0	0	0	0	0	0	0	0	0	0	0	128	64	125	20	38.4	450	3	5	4	4	2	0	0	0	10	29	155	4.51	139.67	23.16	0.85	0.474	19	20	7.1	33.7
1	40	21.48	0	0	0	0	0	0	0	0	0	0	1	0	0	0	0	0	0	0	0	0	0	146	74	78	16	37.3	850	1	15	2	0	2	0	2	0	6	10	138	3.2	164	8.39	0.41	0.422	468	979	24.4	35
0	61	29.38	1	0	0	0	0	0	0	0	1	0	0	0	0	0	0	0	0	0	0	0	0	158	66	87	20	39.1	1050	3	8	4	4	2	0	0	0	10	19	85	3.05	164	8.8	0.34	0.26	24	39	22.7	34
0	67	20.37	1	0	1	0	0	0	0	0	1	1	0	0	0	0	0	1	0	0	1	0	0	129	78	78	18	37.8	950	3	5	4	4	1	0	0	0	9	18	100	2.94	126.25	5.48	0.61	0.306	23	24	20.8	37.7
0	24	24.22	0	0	0	0	0	0	0	0	0	0	0	0	0	0	0	0	0	0	0	0	0	100	62	73	18	38.5	200	3	3	4	4	4	2	2	2	18	17	156	4.9	204.33	8.52	1.47	0.479	13	17	15.8	37.9
0	49	27.93	0	0	0	0	1	0	1	0	0	0	0	0	0	0	0	0	0	0	0	0	0	104	64	75	18	37.1	2460	4	11	4	0	2	1	1	1	9	23	111	3.38	151.33	18.89	1.13	0.34	28	75	17.37	39.5
1	74	25.39	1	0	0	0	0	0	0	0	1	0	0	0	0	0	0	0	0	0	0	0	0	144	70	112	14	36.5	1680	4	12	2	0	2	2	3	1	10	13	42	1.72	53.16	6.16	1.04	0.128	13	26	22.3	30.9
0	60	21.72	0	0	0	0	0	0	0	0	0	0	0	0	0	0	0	0	0	0	0	0	0	136	69	122	12	36	300	3	3	4	4	2	2	2	2	16	29	103	3.51	168.67	13.7	0.92	0.317	16	42	13.6	28.2
1	20	22.04	0	0	0	0	0	0	0	0	0	0	0	0	0	0	0	0	0	0	0	0	0	112	68	82	14	37.3	2265	1	15	4	0	2	1	0	1	8	4	111	3.48	131	6.74	1.07	0.34	159	436	20	26.8
0	73	24.81	1	0	0	0	0	0	0	0	1	0	0	0	0	0	0	0	0	1	0	0	0	150	76	84	18	36.6	610	1	15	2	0	1	1	1	1	6	12	132	4.01	118.66	17.04	1.06	0.405	19	27	12.4	30.8
0	42	24.69	0	0	0	0	0	0	0	0	0	0	0	0	0	0	0	0	0	0	0	0	0	125	63	97	13	37.5	2240	1	15	4	0	1	1	0	0	6	6	50	2.48	40.75	2.81	0.71	0.154	22	26	29.4	29.3
0	67	18.37	0	0	0	0	0	0	0	0	0	0	0	0	0	0	1	0	0	0	1	0	0	102	62	80	12	36.3	800	3	5	4	4	2	1	1	1	13	25	158	4.27	125	9.53	0.9	0.483	14	34	19.2	28
0	49	19.49	0	0	1	0	0	0	0	0	0	1	0	0	0	0	0	0	0	0	0	0	0	91	59	116	18	39.2	1590	3	3	4	4	4	1	1	4	18	28	116	3.36	115.5	18.19	0.53	0.355	39	40	19.53	22.7
0	56	21.47	1	0	0	0	1	0	0	0	1	0	0	0	0	0	1	0	0	0	0	0	0	166	96	72	18	36	1100	3	3	2	0	2	1	1	1	7	23	122	3.65	91.4	7.29	0.76	0.375	41	171	22.3	30.4
0	18	26.18	0	0	0	0	0	0	0	0	0	0	0	0	0	0	0	0	0	0	0	0	0	166	111	108	30	36.5	500	1	15	2	0	2	0	0	0	4	11	86	3.245	149.5	27.1	1.685	0.24	234	166	31.1	31.3
0	62	24.79	1	0	0	0	0	0	0	0	1	0	0	0	0	0	0	0	0	0	1	0	0	143	74	83	19	37.2	2070	3	8	4	4	2	0	0	0	10	18	123	3.98	203	11.95	0.87	0.378	15	36	11.3	35.4
0	34	25.66	0	0	0	0	0	0	0	0	0	0	0	0	0	0	0	0	0	0	0	0	0	144	89	97	17	37.4	1830	2	14	4	0	2	1	1	1	9	1	90	2.758	116.2	8.174	1.28	0.275	74	241	17.1	28.1
0	69	22.56	1	0	0	0	0	0	0	0	1	0	0	0	0	0	0	0	0	0	1	0	0	106	62	59	16	36.8	1400	3	5	4	4	2	1	0	0	11	18	133.57	3.64	127	9.53	0.53	0.4	21	31	22.6	34
1	64	24.31	0	0	0	0	0	0	0	0	0	0	0	0	0	0	0	0	0	0	0	0	0	123	55	95	20	37.3	600	1	15	4	0	2	0	0	0	6	11	118.4	4.06	263	18.97	0.765	0.36	16	27	6.3	33.5
0	45	21.26	0	0	0	0	0	0	0	0	0	0	0	0	0	0	0	0	0	0	0	0	0	141	82	79	18	37.3	1900	3	8	4	4	2	0	0	0	10	14	139	4.24	153	11.03	1.03	0.426	25	27	16.15	36.9
0	76	20.05	0	0	0	0	0	0	0	0	0	0	1	0	0	0	1	0	0	0	0	0	0	133	75	69	18	36.8	1500	1	15	4	0	2	1	1	1	9	21	89	2.81	267	8.17	0.85	0.261	7	11	11	35.1
0	34	31.14	0	0	0	0	0	0	0	0	0	0	0	0	0	0	0	0	0	0	1	0	0	84	56	75	20	36.7	6960	3	5	4	4	1	0	0	0	9	17	151	4.86	134.75	14.27	0.68	0.462	20	31	11.9	27.9
0	69	20.2	0	0	1	0	0	0	0	0	0	1	0	0	0	0	0	0	0	0	1	0	0	139	71	64	14	36	1750	3	8	4	4	1	0	0	0	9	11	120	3.985	155.5	8.5	0.725	0.368	16	23	8.7	28
1	49	19.47	0	1	0	0	0	0	0	0	0	0	0	0	0	0	0	0	0	0	0	0	0	91	64	87	21	37.1	1100	1	15	4	0	4	1	1	1	11	20	126	3.67	124	7.53	0.46	0.387	117	241	10.45	31.4
1	72	25.81	0	0	0	0	0	0	0	0	0	0	0	0	0	0	0	0	0	0	0	0	0	160	69	77	16	38.3	1620	3	3	4	4	1	0	0	0	9	20	87	2.84	141	4.45	0.93	0.268	16	20	18.8	41.3
0	63	19.92	0	0	0	0	0	0	0	0	0	0	1	0	0	0	0	0	0	0	0	0	0	124	72	65	21	37.3	4950	1	15	4	0	2	2	1	1	10	12	84	2.59	7.67	5.07	0.33	0.257	21	13	19.4	24.9
1	50	24.34	0	0	0	0	0	0	0	0	0	0	0	0	0	0	0	0	0	0	0	0	0	135	86	83	15	36.9	3360	1	15	4	0	1	2	0	0	7	5	131	4.06	152	3.685	0.665	0.401	28	45	39.67	21.8
0	58	26.34	0	0	0	0	0	0	0	0	0	0	0	0	0	0	0	0	0	0	1	0	0	171	72	87	23	37.8	1020	3	7	4	4	1	0	0	0	9	16	153	4.38	174.5	13.1	1.32	0.469	16	14	13.6	35.1
1	49	24.2	0	0	1	0	0	0	0	0	0	1	0	0	0	0	0	0	0	0	0	0	0	86	52	130	22	38.6	400	1	15	2	0	1	1	4	0	8	5	101	3.41	10.33	12.32	0.55	0.304	103	148	30.85	25.6
0	68	24.98	0	0	0	0	0	0	0	0	0	0	0	0	0	0	0	0	0	0	0	0	0	175	81	136	16	38.5	2605	1	15	4	2	2	0	0	0	8	8	140	4.17	74	17.52	1.1	0.428	26	45	22.15	36.4
1	50	22.46	0	0	0	0	0	0	0	0	0	0	1	0	0	0	0	0	0	0	0	0	0	101	72	98	18	37.1	2350	1	15	2	0	1	0	2	2	7	17	64	1.93	5	0.56	0.36	0.181	11	14	34.2	39.4
0	51	25.5	0	0	0	0	0	0	0	0	0	0	0	0	0	0	0	0	0	0	0	0	0	121	66	89	16	35.7	2740	3	3	4	4	2	0	0	0	10	19	100	2.96	88.67	9.51	0.82	0.306	8	26	12.45	29.75
0	41	20.96	1	0	0	0	0	0	0	0	1	0	0	0	0	0	0	0	0	0	1	0	0	141	68	63	18	36.9	1100	3	7	4	4	2	0	0	0	10	13	112	2.62	162.33	4.41	1.2	0.342	30	74	18.77	32
1	43	18.37	0	0	1	0	0	1	0	0	0	1	0	0	0	0	0	0	0	0	0	0	0	134	58	108	14	37.2	1700	1	15	4	0	1	2	1	0	8	7	73	2.72	49	6.67	0.715	0.223	23	25	25.9	30.2
0	68	23.95	0	0	0	0	0	0	0	0	0	0	0	0	0	0	0	0	0	0	0	0	0	140	77	70	16	37.2	630	3	6	4	4	1	0	0	0	9	25	110	3.5	158	12.7	1.495	0.338	25	31	21.1	26.1
0	40	25	0	0	0	0	0	0	0	0	0	0	0	0	0	0	0	0	0	0	0	0	0	112	62	83	14	37.6	2700	1	15	4	0	1	1	1	1	8	5	153	4.38	293.67	16.18	1.08	0.468	29	11	8.03	34.37
0	62	26.57	0	0	0	0	0	0	0	0	0	0	0	0	0	0	0	0	0	0	0	0	0	148	69	71	16	37.2	2250	3	4	4	4	2	1	1	1	13	15	109	3.65	183.33	4.52	0.66	0.335	210	111	6.5	37.4
1	68	23.07	1	0	0	0	0	0	0	0	1	0	0	0	0	0	0	0	0	0	0	0	0	186	95	87	16	36.5	1050	1	15	2	0	2	1	1	1	7	10	123	3.155	133	7.325	1.83	0.376	13	21	10.2	41.5
0	62	23.88	0	0	0	0	0	0	0	0	0	0	0	0	0	0	0	0	0	1	0	0	0	106	65	70	16	37.4	390	1	15	4	0	1	1	0	1	7	9	174	7.56	122.5	5.43	0.89	0.534	15	28	36	31.3
1	60	25.39	0	0	1	0	0	0	0	0	0	1	0	0	0	0	0	0	0	0	0	0	0	117	65	71	15	38.3	1200	1	15	1	1	1	2	1	1	7	7	111	3.405	180	6.57	1.55	0.339	31	28	9.1	32.1
1	76	19.56	0	0	0	0	0	0	0	0	0	0	0	0	0	0	0	0	0	0	0	0	0	88	32	88	18	36.7	30	1	15	4	0	4	4	4	4	20	39	72	2.14	30	1.68	0.32	0.221	55	185	83.7	30.9
0	46	23.88	1	0	0	0	0	0	0	0	1	0	0	0	0	0	0	0	0	0	0	0	0	225	103	74	18	36.9	1950	3	3	2	0	2	2	1	1	8	22	141	4.19	162	19.96	1.01	0.432	41	20	9.6	35.4
0	54	21.01	0	0	0	0	0	0	0	0	0	0	0	0	0	0	0	0	0	0	0	0	0	113	62	51	19	36.1	1800	1	15	3	0	2	1	1	1	8	4	106	3.095	58.83	6.01	0.27	0.325	36	64	27.7	29.8
0	57	25.94	0	0	0	0	1	0	1	0	0	0	0	0	0	0	0	0	0	0	0	0	0	130	81	79	18	36.6	1510	1	15	3	0	2	1	1	1	8	5	130	3.98	171.25	10.23	0.47	0.398	12	16	19.65	36.9
0	37	17.96	0	0	0	0	0	0	0	0	0	0	1	0	0	0	0	0	0	0	0	0	0	98	59	84	21	37.1	1400	1	15	4	0	2	4	4	4	18	9	75	2.3	167	5.48	0.31	0.23	18	43	17.7	26.2
0	74	16.44	0	0	0	0	0	0	0	0	0	0	1	0	0	0	0	0	0	0	1	0	0	198	79	83	14	36.9	1300	3	7	4	3	1	1	1	1	11	10	125	5.35	163.33	8.04	0.34	0.383	14	24	13.9	34.9
0	68	25.9	0	0	0	0	0	0	0	0	0	0	0	0	0	0	0	0	0	0	1	0	0	95	60	98	21	37	850	4	10	4	2	2	1	1	1	11	15	122	3.76	207	16.23	0.815	0.373	7	40	11.2	33.4
1	56	23.88	0	0	0	0	0	0	0	0	0	0	0	0	0	0	0	0	0	0	0	0	0	132	84	92	19	38.2	2200	2	13	4	1	1	1	1	1	9	11	68	2.115	107.5	4.965	0.58	0.208	60	34	36.3	28.8
0	59	19.55	1	0	0	0	0	0	0	0	1	0	1	0	0	0	0	1	0	0	1	0	0	110	70	110	18	36.9	1000	1	15	1	0	2	1	1	1	6	22	92	2.87	86	15.66	0.56	0.266	64	1178	110.8	27.8
0	48	24.45	1	0	1	0	0	0	0	0	1	1	0	0	0	0	0	0	0	0	1	0	0	173	96	104	14	39	2500	3	3	4	4	3	1	1	2	15	24	166	4.97	173.5	9.45	0.705	0.508	21	14	10.1	36
0	74	24.22	1	0	0	0	0	0	0	0	1	0	1	0	0	0	0	0	0	0	0	0	0	100	61	74	18	37.3	950	1	15	1	0	3	2	0	1	7	11	101	2.44	176.33	3.38	0.25	0.31	68	136	35.9	32.1
0	85	19.59	0	0	0	0	1	0	1	0	0	0	0	1	0	0	1	0	0	0	0	0	0	100	68	77	30	38.2	470	3	8	4	4	4	3	3	4	22	26	57	2.08	347	9.66	0.48	0.175	24	30	30.8	27.4
1	63	15	1	1	0	0	0	0	0	0	1	0	0	0	0	0	0	0	0	0	0	0	0	107	66	104	36	36.7	250	1	15	4	0	4	2	2	2	14	18	125	3.91	164.67	17.26	0.62	0.383	17	42	13.7	26.5
0	44	24.8	1	0	1	0	0	0	0	0	1	1	0	0	1	0	0	0	0	0	0	0	0	91	62	124	21	37.3	450	4	9	4	3	4	0	2	2	15	9	113	4.49	23	56.45	0.48	0.346	32	53	11.3	29.2
0	57	19.56	1	0	0	0	0	0	0	0	1	0	0	0	0	0	0	0	0	0	0	0	0	120	71	54	14	36.5	1220	3	7	4	4	2	0	0	0	10	8	141	4.15	142	9.63	0.825	0.431	27	25	16.4	41.2
1	67	19.23	0	0	1	0	0	0	0	0	0	1	0	0	0	0	0	0	0	0	0	0	0	127	56	88	18	37.3	1400	1	15	2	0	2	1	1	0	6	11	73	2.595	191.5	5.07	1.775	0.224	29	29	11.2	28
1	47	19.38	0	0	0	0	0	0	0	0	0	0	1	0	0	0	1	0	0	0	0	0	0	101	65	91	20	36	1050	1	15	4	0	4	4	4	4	20	10	72	1.91	38.67	1.24	0.125	0.22	6	13	22.9	34.3
0	75	25.81	0	0	1	0	0	0	0	0	0	0	1	0	0	0	0	0	0	0	0	0	0	98	68	70	18	36.7	385	1	15	4	0	4	4	4	4	20	27	106	3.85	71	1.19	0.23	0.332	48	70	23	35.4
1	56	27.74	1	0	0	0	0	0	0	0	1	0	0	0	0	0	0	0	0	0	0	0	0	121	69	59	20	37	1400	1	15	4	0	4	1	1	4	14	19	122	3.8	74	2.255	0.25	0.375	39	54	9.9	26.1
1	56	22.09	1	0	0	0	0	0	0	0	1	0	0	0	0	0	0	0	0	0	0	0	0	162	88	74	15	37.3	1720	3	7	2	2	2	2	0	2	10	21	118	3.48	157	11.76	0.81	0.362	24	23	11.3	26.7
0	56	19.57	0	0	1	0	0	1	0	0	0	1	0	0	0	0	0	0	0	0	0	0	0	134	96	137	34	39.5	850	1	15	4	0	4	2	2	4	16	21	127	3.632	79.8	12.68	0.27	0.388	158	630	40.1	31.7
0	52	20.07	1	0	0	0	0	0	0	0	1	0	0	0	0	0	0	0	0	0	1	0	0	125	79	64	12	36	1550	3	3	4	4	2	0	0	0	10	9	117	4.25	178	12.85	0.84	0.358	8	17	13.1	35.6
0	63	22.49	0	0	0	0	0	0	0	0	0	0	0	0	0	0	0	0	0	0	1	0	0	119	56	87	14	36.6	970	1	15	4	0	1	0	0	0	5	11	114	3.83	55	3.8	0.4	0.348	6	18	12.9	22.1
1	42	23.4	0	0	0	0	0	0	0	0	0	0	0	0	0	0	0	0	0	0	0	0	0	101	56	108	28	37.7	600	1	15	4	0	0	0	0	0	4	5	81	2.72	398.33	26.54	0.76	0.247	4	10	19.8	21.7
1	73	24.46	1	0	1	0	0	0	0	0	1	1	0	0	0	0	0	0	0	0	1	0	0	153	67	40	12	36.8	1200	3	3	4	4	1	0	0	0	9	16	110	3.32	118.33	6.44	0.84	0.338	31	26	17.9	30.5
0	54	27.55	1	0	0	0	0	0	0	0	1	0	0	0	0	0	0	0	0	0	1	0	0	139	87	86	12	37	2050	1	15	4	0	2	0	0	0	6	11	139	4.32	208	6.15	0.99	0.425	26	21	24.2	41.1
0	33	29.51	0	0	0	0	0	0	0	0	0	0	0	0	0	0	0	0	0	0	0	0	0	145	91	82	16	37.2	1000	1	15	4	0	2	1	1	1	9	9	144	3.58	69	5.73	1.73	0.441	12	13	16.3	28.7
0	81	19.53	1	0	0	0	0	0	0	0	1	0	0	0	0	0	1	0	0	0	1	0	0	163	103	110	23	38.2	1170	1	15	2	0	0	1	1	1	5	18	169	4.785	351.17	10.91	0.57	0.519	14	58	30.7	35.7
0	94	14.88	1	0	0	0	0	0	0	0	1	0	0	0	0	0	0	0	0	0	0	0	0	144	76	85	17	36	2780	1	15	2	0	1	1	1	1	6	10	83	3.05	225	2.45	0.65	0.254	7	20	25.8	40.9
0	57	22.58	1	0	0	0	0	0	0	0	1	0	0	0	0	0	0	0	0	0	0	0	0	201	67	79	21	37.6	780	1	15	4	0	1	0	0	0	5	3	131	3.46	172.5	10.58	1.33	0.401	13	19	19.9	37.6
0	83	22.4	1	0	0	0	0	0	0	0	1	0	0	0	0	0	0	0	0	0	1	0	0	202	85	95	15	38.2	700	1	15	2	0	2	1	1	1	7	20	79	2.19	118.4	6.84	1.49	0.241	7	14	13.6	36
0	74	23.81	0	0	0	0	0	0	0	0	0	0	0	0	0	0	0	0	0	0	0	0	0	158	64	118	14	37.9	500	1	15	4	0	4	4	4	4	20	11	153	3.75	53	2.37	0.41	0.47	215	1292	16	20.7
0	39	20.76	0	0	0	0	0	0	0	0	0	0	0	0	0	0	0	0	0	0	0	0	0	135	98	108	14	37.1	1910	3	7	1	4	1	1	1	1	9	2	112	3.73	75	12.1	1.87	0.343	15	8	7.9	31.6
1	49	23.1	0	0	0	0	0	0	0	0	0	0	0	0	0	0	0	0	0	0	0	0	0	87	54	78	18	37.1	1900	1	15	0	0	2	2	2	1	7	9	73	2.22	9.67	3.47	2.09	0.224	6	10	18.2	30.9
0	67	17.57	0	1	0	0	0	0	0	0	0	0	1	0	0	0	1	0	0	0	0	0	0	123	61	110	22	36.8	500	1	15	4	0	3	2	2	4	15	2	135	3.67	139.83	8.35	0.29	0.414	118	96	20.9	24.4
0	67	20	0	0	0	0	0	0	0	0	0	0	0	0	0	0	0	0	0	0	0	0	0	105	59	89	20	37.2	1610	3	5	4	0	2	1	1	1	9	15	111	3.45	89.67	11.14	0.7	0.34	38	62	33.1	32.5
0	84	21.26	1	0	0	0	0	0	0	0	1	0	1	0	0	0	1	1	0	0	1	0	0	74	36	117	16	38.8	550	3	5	4	4	2	0	0	0	10	27	74	2.04	101.33	6.47	0.44	0.226	10	21	12.2	23.5
0	58	24.49	1	0	0	0	0	0	1	0	0	0	1	0	0	0	0	0	0	0	0	0	0	122	72	77	19	37.2	200	1	15	1	0	2	1	1	1	6	15	128	4.16	348	18.62	0.84	0.384	16	19	54.5	32.7
0	65	26.12	1	0	0	0	0	0	0	0	1	0	0	0	0	0	0	1	0	0	0	0	0	172	64	85	20	37.5	165	1	15	4	0	2	0	0	1	7	7	145	3.686	247.2	10.478	0.576	0.444	16	18	8.1	30.8
0	20	16.9	0	0	0	0	0	0	0	0	0	0	0	0	0	0	0	0	0	0	0	0	0	111	75	135	20	37.1	2000	3	5	4	4	2	1	1	1	13	21	65	2.45	24.83	7.99	0.85	0.198	25	85	24.3	29.1
0	64	19.59	0	0	0	0	0	0	0	0	0	0	0	0	0	0	0	0	0	0	0	0	0	129	59	69	20	36	925	1	15	2	0	2	2	2	0	8	3	123	4.075	249	7.99	0.85	0.378	44.5	35	23.6	24.4
0	74	23.66	0	0	0	0	0	0	0	0	0	0	0	0	0	0	0	0	0	0	0	0	0	133	66	82	25	38.3	2060	3	3	4	4	2	1	1	1	13	33	114	3.22	94	9.04	0.69	0.349	28	98	26.3	26.8
0	52	23.84	0	0	0	0	0	0	0	0	0	0	1	0	0	0	0	0	0	0	0	0	0	99	56	72	19	36.3	1200	1	15	2	0	1	1	1	1	6	6	106	3.225	140	7.975	0.615	0.325	28	24	9.1	26
0	30	27.47	0	0	0	0	0	0	0	0	0	0	0	0	0	0	0	0	0	0	0	0	0	120	55	83	17	38.1	0	3	4	4	4	4	2	2	2	18	21	67	2.19	15.43	4.91	0.33	0.205	171	476	188	34.6
0	84	20.55	1	0	0	0	0	0	0	0	1	0	0	0	0	0	0	0	0	0	0	0	0	138	58	126	28	38	500	3	3	4	0	4	0	0	0	8	33	101	3.38	293.5	4.47	0.52	0.308	23	26	51.1	25.6
0	75	24.22	0	0	0	0	1	0	0	0	0	0	0	0	0	0	0	0	0	0	0	0	0	103	45	109	19	37.9	480	4	10	4	0	1	1	1	1	8	13	119	3.32	32.33	4.33	0.28	0.366	19	47	15.2	27.7
1	23	21.09	0	0	0	0	1	0	0	0	0	0	0	0	0	0	0	0	0	0	0	0	0	84	58	119	22	38.2	1930	1	15	1	0	3	1	0	1	6	10	86	3.35	260	14.9	2.12	0.259	33	54	20.1	28.1
0	56	27.55	0	0	0	0	0	0	0	0	0	0	1	0	0	0	0	0	0	0	0	0	0	78	42	83	14	36.6	1150	1	15	1	0	3	1	1	1	7	19	144	4.9	271	5.49	0.83	0.423	14	28	19.1	31.6
0	69	22.49	0	0	0	0	0	0	0	0	0	0	0	0	0	0	0	0	0	0	0	0	0	122	79	88	19	37	550	1	15	2	0	1	0	0	0	3	10	106	3.38	226.67	6.11	1.82	0.325	18	20	22	27.8
1	85	31.25	1	1	0	0	0	0	0	0	1	0	0	0	0	0	0	1	0	1	0	0	0	102	55	83	18	37	1050	1	15	3	0	2	1	1	1	8	12	98	2.37	67.8	7.814	0.88	0.3	8	89	10.2	35.5
1	68	23.67	0	0	0	0	0	0	0	0	0	0	0	0	0	0	0	0	0	0	0	0	0	121	80	81	14	37.2	1750	3	4	4	4	1	0	0	0	9	9	115	3.505	147.75	13.19	0.88	0.353	36	40	20.4	31.5
1	81	24.55	0	0	0	0	1	0	0	0	0	0	0	0	0	0	0	0	0	0	1	0	0	103	83	125	25	36.9	1525	1	15	2	0	2	0	0	1	5	21	112	3.73	224	13.665	0.5325	0.344	27	108	11.4	33.2
1	75	24.3	1	0	0	0	0	0	0	0	1	0	1	0	0	0	0	0	0	0	0	0	0	135	64	65	18	37.3	1700	1	15	4	0	1	1	1	1	8	10	98	2.9	170.5	8.66	0.925	0.302	8	31	8.5	30.5
0	49	22.49	0	0	0	0	0	0	0	0	0	0	0	0	0	0	0	0	0	0	0	0	0	103	76	90	16	38.2	700	1	15	2	2	2	1	1	1	9	4	96	3.03	284.5	19.755	1.14	0.294	24	18	13.4	25.4
0	21	24.93	0	0	0	0	0	0	0	0	0	0	0	0	0	0	0	0	0	0	0	0	0	118	53	137	20	38	1000	1	15	2	0	2	1	1	1	7	19	129	3.92	50.25	3.22	0.285	0.395	35	23	12.6	46.7
0	65	25.95	0	0	0	0	0	1	0	0	0	0	0	0	0	0	0	0	0	0	0	0	1	109	86	51	19	37.1	1300	1	15	2	0	2	1	1	1	7	18	78	2.66	34.5	3.39	0.42	0.24	27	25	57.3	27.7
0	53	25.53	0	0	1	0	0	0	0	0	0	1	0	0	0	0	0	0	0	0	0	0	0	131	72	73	15	37.3	1650	1	15	3	0	2	2	2	2	11	17	105	3.31	221.33	5.34	0.96	0.321	6	11	23.6	27.8
1	78	26.67	1	0	0	0	0	0	0	0	1	1	0	0	0	0	0	1	0	1	0	0	0	95	53	111	21	37.8	615	1	15	1	1	2	1	1	1	7	25	126	4.17	350	28.76	1.84	0.372	10	22	16.4	36.8
0	71	21.34	1	0	0	0	0	0	0	1	1	0	0	0	0	0	0	0	0	0	1	0	0	140	73	109	19	37.3	750	1	15	2	0	2	1	1	1	7	19	122	3.39	187.8	23.04	1.248	0.375	45	72	47.8	23.2
0	35	22.84	0	0	0	0	0	0	0	0	0	0	0	0	0	0	0	0	0	0	0	0	0	137	79	79	20	38	1100	1	15	2	0	2	1	1	2	8	5	152	4.65	210	15.88	0.82	0.465	68	64	13.9	39.2
0	28	29.39	0	0	0	0	0	0	0	0	0	0	0	0	1	0	0	0	0	0	0	0	0	105	56	124	15	37.3	100	1	15	2	0	2	2	2	2	10	24	116	3.57	124	13.52	1.805	0.355	22	126	54.5	22.9
1	52	29.64	0	0	0	0	0	0	0	0	0	0	0	0	0	0	0	0	0	0	0	0	0	101	81	99	15	35.5	1700	3	7	4	4	4	4	4	4	24	22	140	2.64	17	6.2	0.496	0.43	112	301	414	38.2
0	89	25.6	1	0	0	0	0	0	0	0	1	0	1	0	0	0	0	1	0	0	1	0	0	110	35	88	18	37	845	3	3	4	4	4	2	2	4	20	43	115	2.5	138.17	7.56	1.27	0.352	14	28	13.3	26.9
0	29	28.91	1	0	0	0	0	1	0	0	1	0	0	0	0	0	0	0	0	0	0	0	0	151	100	83	16	37.5	1375	1	15	2	2	0	0	0	0	4	8	132	3.672	137.8	15.97	1.002	0.404	42	74	12.6	35
0	59	27.68	0	0	0	0	0	0	0	0	0	0	0	0	0	0	0	0	0	0	0	0	1	104	43	84	25	36.8	400	1	15	1	0	2	2	4	2	11	8	49	1.94	58.2	11.04	1.016	0.152	163	295	13.6	25.1
0	61	27.43	0	0	1	0	1	0	1	0	0	1	0	1	0	0	0	0	0	0	0	0	0	126	62	83	16	37	2550	1	15	1	0	2	1	1	1	6	13	153	4.675	219.5	10.16	1.455	0.468	78	374	11.4	39.1
1	45	18.82	0	0	0	0	0	0	0	0	0	0	0	0	0	0	0	0	0	0	0	0	0	139	73	68	16	37.8	2900	4	11	4	3	2	2	2	1	14	8	97	3.12	136	9.85	0.955	0.298	38	22	13.2	36.2
1	69	18.75	0	0	0	0	0	0	0	0	0	0	1	0	0	0	0	0	0	0	0	0	0	90	53	118	18	36.8	1300	1	15	4	0	4	2	2	2	14	10	80	2.38	16.83	4.925	0.13	0.244	35	76	124.8	44.2
0	66	19.2	1	0	0	0	1	0	0	0	1	0	1	1	0	0	1	0	0	0	0	0	0	137	77	83	18	36.3	1700	1	15	4	0	2	1	1	1	9	21	108	3.36	142	7.63	1.61	0.328	18	27	13.6	34.2
0	41	35.43	1	0	0	0	0	0	0	0	1	0	0	0	0	0	0	0	0	0	0	0	0	111	50	82	19	36.8	765	1	15	4	0	2	2	0	2	10	11	152	4.55	190	10.29	1.14	0.466	21	19	37.7	35.4
0	78	19.03	0	0	0	0	0	0	0	0	0	0	0	0	0	0	1	0	0	0	0	0	0	151	55	120	16	36.3	1400	1	15	3	0	2	1	1	1	8	11	103	3.318	158.4	12.394	0.472	0.316	182	385	14.5	23.9
0	39	22.49	0	0	0	0	0	0	0	0	0	0	0	0	1	0	0	0	0	0	0	0	0	122	64	114	26	37.5	165	1	15	2	0	2	1	2	2	9	11	135	3.96	115	6.88	1.32	0.413	30	65	43.2	18.1
0	57	14.04	0	0	0	0	0	0	0	0	0	0	1	0	0	0	0	0	0	0	0	0	0	137	109	106	23	36.8	910	1	15	4	0	2	0	0	1	7	15	72	2.35	306.33	16.88	0.89	0.221	7	19	15.7	28.9
0	38	23.26	0	0	0	0	0	0	0	0	0	0	1	0	0	0	0	0	0	0	0	0	0	105	66	88	20	39	220	1	15	4	0	1	2	1	1	9	16	124	3.34	19.8	9.95	0.422	0.379	462	391	27.3	28.3
0	57	17.04	0	1	0	0	0	0	0	0	0	0	0	0	0	0	1	0	0	1	0	0	0	126	85	118	21	36.8	100	1	15	3	0	1	1	1	1	7	14	146	4.61	177	12.8	1.35	0.449	34	79	19.8	27.5
1	70	16.65	1	0	0	0	0	0	0	1	1	0	0	0	0	0	0	0	0	0	0	0	0	110	50	86	12	37.6	900	1	15	4	0	2	0	0	0	6	12	97	3.705	197.5	10.59	0.545	0.296	15	18	11.1	30.3
0	44	25.95	0	0	0	0	0	0	0	0	0	0	0	0	0	0	0	1	0	0	0	0	0	81	53	97	24	38	1650	1	15	4	0	2	2	2	2	12	12	141	4.15	85.4	4.084	0.456	0.432	55	191	15.4	26.6
0	89	22.49	1	0	0	0	0	0	0	1	1	0	1	0	0	0	0	0	0	0	0	0	0	178	74	84	18	37.1	3650	1	15	4	1	1	1	1	1	9	15	80	2.86	204	12.09	0.59	0.247	13	37	10.5	32.3
0	59	24.49	1	0	0	0	0	0	0	0	1	0	0	0	0	0	0	0	0	0	0	0	0	114	86	126	32	38.2	1790	1	15	2	0	4	2	2	2	12	30	159	4.154	63.2	3.348	0.56	0.489	14	37	20.6	27.6
1	49	26.22	0	0	0	0	0	0	0	0	0	0	0	0	0	0	0	0	0	0	0	0	0	126	83	102	19	37.5	1750	3	5	3	4	1	0	0	0	8	19	129	4.57	153.5	11.57	0.52	0.396	40	30	17.9	32.8
0	37	32.41	1	0	0	0	0	0	0	0	1	0	0	0	0	0	0	0	0	0	0	0	0	174	120	130	23	38.3	3400	1	15	3	0	1	1	1	1	7	11	137	4.53	299.5	12.89	0.98	0.42	53	43	6.8	36.3
0	63	27.68	1	0	0	0	0	0	0	0	1	0	0	0	0	0	0	0	0	0	0	0	0	113	61	97	25	37.3	1050	1	15	4	0	1	1	0	1	7	18	146	4.54	219	21.25	1.03	0.447	28	101	14.9	26.8
0	66	27.1	1	0	0	0	0	0	0	0	1	0	0	0	0	0	0	0	0	0	0	0	0	132	61	83	10	36.9	1380	1	15	4	0	2	4	0	2	12	14	116	3.31	69.25	3.99	0.46	0.356	46	58	108	21.6
1	66	22.43	0	1	0	0	1	0	0	0	0	0	0	0	0	0	0	0	0	1	0	0	0	120	60	89	19	38	100	1	15	4	0	2	0	0	0	6	3	126	3.35	92.5	5.36	0.355	0.387	9	19	20.7	37.7
0	67	20.57	0	0	0	0	0	0	0	0	0	0	0	0	0	0	0	0	0	0	0	0	0	141	71	55	19	37	1120	1	15	4	0	1	0	0	0	5	8	129	3.83	146.5	7.97	0.205	0.396	27	20	10.5	27.6
0	42	27.76	0	0	0	0	0	0	0	0	0	0	0	0	0	0	0	0	0	0	0	0	0	105	67	74	16	36.8	2180	1	15	4	0	2	0	0	0	6	6	111	3.4	384.67	6.93	0.72	0.341	25	21	13	32
0	76	22.57	1	0	0	0	0	0	0	0	1	0	1	0	0	0	0	0	0	1	1	0	0	113	64	124	28	37.1	3480	1	15	4	0	2	2	2	1	11	18	141	3.036	456.2	17.07	0.448	0.434	14	38	12.8	18.2
1	48	23.88	0	0	0	0	0	0	0	0	0	0	0	0	0	0	0	0	0	0	0	0	0	138	84	110	19	37.2	475	1	15	4	0	3	1	1	1	10	14	121	3.84	279	20.93	0.66	0.365	35	36	9.9	24.4
0	56	27.7	0	0	1	0	0	0	0	0	0	1	0	0	0	0	0	0	0	0	0	0	0	90	60	103	22	36.8	150	3	3	4	4	4	0	0	4	16	21	164	4.01	123.83	5.42	0.45	0.503	22	20	13.2	33.3
0	52	25.09	0	0	1	0	0	0	0	0	0	1	0	0	0	0	0	0	0	0	0	0	0	106	56	83	18	37	1200	2	13	0	1	2	1	0	0	4	15	131	3.69	103.33	10.64	0.57	0.4	131	98	18.8	28.7
1	69	15.56	1	0	1	0	0	0	0	0	1	1	0	0	0	0	0	1	0	0	0	0	0	131	45	73	18	35	30	1	15	4	0	3	0	0	2	9	26	48	1.865	135.83	7.45	0.29	0.146	80	100	14	23.8
0	56	25.21	0	0	0	0	0	0	0	0	0	0	0	0	0	0	0	0	0	0	0	0	0	81	64	92	20	36	2370	1	15	4	0	2	0	0	0	6	17	141	3.506	125.4	6.756	0.446	0.431	25	50	8.4	24.2
0	65	25.35	1	1	0	0	0	0	0	0	1	0	0	0	0	0	0	0	0	1	0	0	0	151	76	117	32	38.9	1250	1	15	4	0	2	0	2	1	9	25	139	3.68	243	29.23	0.66	0.427	16	18	8.5	36.1
0	73	20.96	0	0	0	0	0	0	0	0	0	0	1	0	0	0	0	0	0	0	0	0	0	111	63	73	18	36.7	2050	1	15	4	0	2	1	1	0	8	19	120	2.91	109.33	10.8	0.5	0.367	54	65	6.1	25.9
0	31	17.96	0	0	0	0	0	0	0	0	0	0	0	0	0	0	0	1	0	0	0	0	0	143	90	106	29	37	350	3	3	4	0	4	0	0	4	12	37	62	1.9	220	15.1	0.6	0.191	378	264	13.1	25.2
0	66	18.73	0	0	0	0	0	0	0	0	0	0	0	0	0	0	0	0	0	0	0	0	0	110	52	127	23	36.6	3060	1	15	4	0	2	1	1	1	9	14	130	4.11	303	20.52	0.66	0.392	11	59	18.4	46.1
0	73	28.58	1	0	0	0	0	0	0	0	1	0	1	0	0	0	0	0	0	0	0	0	0	109	55	85	23	36	1240	1	15	4	0	3	0	0	0	7	8	135	4.565	290.5	23.9	0.485	0.413	41	24	6.2	21.5
0	27	20.24	0	0	0	0	0	0	0	0	0	0	0	0	0	0	0	0	0	0	0	0	0	122	54	113	31	38.8	400	1	15	4	0	1	0	1	1	7	11	95	3.61	340	7.49	1.155	0.292	9	41	9.4	25.4
0	80	17.3	1	1	0	1	0	0	0	0	1	0	0	0	0	0	0	1	0	1	1	0	0	209	121	91	20	36.6	350	3	3	4	3	4	2	2	4	19	27	72	2.47	189.5	6.56	0.545	0.22	5	15	8	37.4
1	48	23.42	0	0	0	0	0	0	0	0	0	0	0	0	0	0	0	0	0	0	1	0	0	151	58	77	22	37.4	100	3	6	2	4	1	0	0	2	9	18	61	2.48	95	7.26	0.68	0.187	4991	5977	31.4	31
0	33	25.71	0	0	1	0	0	0	0	0	0	1	0	0	0	0	0	0	0	0	0	0	0	101	75	156	20	38.6	1500	1	15	4	0	2	1	0	2	9	9	173	4.875	164	5.435	0.73	0.53	13	36	7.2	22.6
0	63	23.51	1	0	0	0	0	0	0	0	1	0	0	0	0	0	0	0	0	0	0	0	0	98	55	101	29	37.5	690	1	15	2	0	2	0	0	2	6	13	75	2.41	362	7.43	2.6	0.228	17	27	16.6	31.3
1	74	21.11	0	0	0	0	0	0	0	0	0	0	1	0	0	0	0	0	0	0	0	0	0	141	61	73	19	37.5	600	1	15	1	0	4	0	0	1	6	5	88	2.91	105.67	4.76	0.46	0.27	36	54	22.9	31.5
0	78	19.14	0	0	0	0	0	0	0	0	0	0	0	0	0	0	0	0	0	0	0	0	0	108	53	66	24	36	650	4	11	4	0	2	0	0	0	6	13	64	2.29	286	6.58	0.39	0.197	279	249	7.4	25.6
1	52	19.53	0	0	1	0	0	0	0	0	0	1	0	0	0	0	0	0	0	0	0	0	0	108	62	105	19	36.5	750	1	15	4	0	2	1	1	1	9	5	118	3.73	35	2.41	0.25	0.338	17	34	16.2	30.3
1	70	20.96	1	0	0	0	0	0	0	0	1	0	0	0	0	0	0	0	0	0	0	0	0	123	92	75	15	36.1	1100	3	4	4	4	2	0	0	0	10	23	81	2.49	114.5	11.83	1.035	0.249	41	63	9.5	29.5
0	62	35.49	1	0	0	0	0	0	0	0	1	0	0	0	0	0	0	0	0	0	0	0	0	116	69	73	20	36.1	1860	1	15	4	0	2	0	0	0	6	12	130	3.97	137.5	5.105	2.6	0.399	35	81	20.3	30.5
0	54	24.22	0	0	0	0	0	0	0	0	0	0	0	0	0	0	0	1	0	0	1	0	0	147	65	89	26	36.7	2900	3	3	4	4	4	0	0	2	14	12	79	2.66	214	15.07	2.6	0.242	199	571	50.9	25.8
1	64	19.63	1	0	0	0	0	0	0	0	1	0	0	0	0	0	0	0	0	0	0	0	0	156	85	86	19	36.9	1300	1	15	4	0	2	0	0	0	6	17	103	3.15	148	18.775	0.31	0.316	11	18	10.4	24.55
1	73	18.14	0	0	0	0	0	0	0	0	0	0	0	0	0	0	0	0	0	0	1	0	0	130	55	103	30	36.2	1150	4	9	2	2	2	0	0	0	6	5	89	2.74	458.5	9.725	1.025	0.274	17	25	11.3	35.2
0	74	21.48	0	0	0	0	1	0	0	0	0	0	0	1	0	0	0	0	0	0	1	0	0	113	42	97	13	38.8	250	2	13	4	0	4	2	0	2	12	18	80	2.74	169.25	16.78	0.77	0.244	19	34	11.6	24.7
1	25	26.37	0	0	0	0	0	0	0	0	0	0	0	0	0	0	0	0	0	0	0	0	0	95	59	124	17	37.6	3380	3	3	4	4	4	0	0	3	15	24	120	3.244	239.2	17.304	0.62	0.369	199	182	6.1	38.3
0	82	22.49	1	0	1	1	0	0	0	0	1	1	0	0	0	0	0	1	0	0	1	0	0	147	71	92	18	37.3	1650	3	8	4	2	2	0	0	2	10	20	143	4.18	120.5	7.875	0.68	0.437	30	28	39.2	39.1
0	55	28	1	0	0	0	0	0	0	0	1	0	0	0	0	0	0	0	0	0	0	0	0	90	74	123	26	36	890	3	3	4	4	4	2	2	2	18	24	53	1.67	106	14.95	2.19	0.159	7	17	18.3	36.2
1	55	21.67	0	0	0	0	0	0	0	0	0	0	1	0	0	0	0	0	0	0	0	0	0	115	56	76	17	37.1	1560	1	15	4	0	4	3	3	4	18	24	66	2.11	24.14	0.14	0.93	0.202	162	878	71.4	29.3
0	90	20.55	1	0	0	0	0	0	0	0	1	0	0	0	0	0	0	0	0	0	0	0	0	142	71	84	22	39.1	800	1	15	4	0	4	0	0	0	8	13	112	3.51	168	2.97	0.21	0.343	28	41	11.75	28.7
0	34	29.05	0	0	0	0	0	0	0	0	0	0	0	0	0	0	0	0	0	0	0	0	0	108	73	93	21	37.9	1600	4	12	3	1	3	0	0	0	7	16	149	4.855	228	11.925	1.78	0.456	25	27	17.6	41.2
0	77	19.03	0	0	0	0	0	1	0	0	0	0	0	0	0	0	0	0	0	1	1	0	0	178	77	101	23	37.3	490	1	15	4	0	2	4	2	4	16	23	128	3.77	137.67	8.81	0.19	0.391	63	122	10.1	23.8
0	46	42.25	0	0	0	0	0	0	0	0	0	0	0	0	0	0	0	0	0	0	0	0	0	118	59	109	19	35.8	0	3	3	4	4	4	4	4	4	24	44	83	2.475	38.33	19.755	1.1	0.253	30	180	106.77	26.1
0	37	18.42	1	0	0	1	0	0	0	0	1	0	0	0	0	0	0	1	0	0	1	0	0	135	70	128	20	36.3	0	3	6	3	3	2	0	0	0	8	21	76	2.67	282.33	7.1	0.54	0.233	2	8	7	31
0	50	30.12	1	0	0	0	0	0	0	0	1	0	0	0	0	0	0	0	0	0	0	0	0	157	87	109	22	37.7	1950	3	7	4	4	2	2	2	1	15	24	189	2.632	247.6	6.33	0.92	0.579	39	48	13.47	28.17
0	59	26.3	1	0	0	0	0	0	0	0	1	0	0	0	0	0	0	0	0	0	0	0	0	125	81	88	17	37.4	1600	1	15	0	0	2	2	2	1	7	10	132	4.19	397	12.62	0.8	0.388	25	14	11.6	33.4
0	80	22.49	1	0	0	1	0	0	0	0	1	0	0	0	0	0	0	1	0	0	0	0	0	96	54	124	28	38.2	800	1	15	2	0	2	2	0	2	8	10	144	4.31	121	7.62	0.32	0.442	91	109	18.1	23.8
1	63	25.48	0	0	0	0	0	1	0	0	0	0	1	0	0	0	0	0	0	0	0	0	0	159	118	96	16	36.8	3230	3	7	4	4	4	2	0	0	14	20	123	3.54	117	3.28	0.52	0.378	23	31	18.5	25.1
0	74	21.45	0	0	0	0	0	0	0	0	0	0	1	0	0	0	0	0	0	0	0	0	0	124	72	85	19	37.5	1970	1	15	0	0	4	4	2	1	11	22	109	2.89	40.33	17.11	0.89	0.334	15.67	48	20.73	31.23
1	60	27.47	0	0	0	0	1	0	0	0	0	0	0	0	0	0	0	0	0	0	0	0	0	108	72	114	18	38	1350	1	15	2	0	2	0	0	0	4	11	119	2.39	37.71	8.25	0.9	0.365	13	69	41.7	25.5
0	49	18.59	0	0	0	0	0	0	0	0	0	0	0	0	0	0	0	0	0	0	0	0	0	168	84	69	18	36.2	1300	3	3	4	2	2	3	4	2	17	35	72	1.78	19	5.84	0.49	0.221	98	246	74.4	17.03
1	69	21.72	0	0	0	0	0	0	0	0	0	0	0	0	0	0	0	0	0	0	0	0	0	195	81	137	27	37.3	2320	1	15	4	0	2	1	1	2	10	11	143	4.144	152.4	9.024	0.718	0.439	103	89	35.93	45.1
1	71	22.51	1	1	1	1	1	1	1	1	0	0	0	1	0	0	0	0	0	0	0	0	0	115	58	109	19	39	120	1	15	4	0	4	0	2	4	14	11	96	3.178	75	13.43	0.414	0.295	132	292	19.1	23.3
0	73	24.49	1	0	0	0	0	0	0	0	1	0	0	0	0	0	0	0	0	0	0	0	0	121	55	96	21	36.9	3510	1	15	4	0	3	0	0	2	9	18	73	2.24	212.67	13.45	0.48	0.225	33	17	22.9	27.3
0	64	26.89	0	0	0	0	0	0	0	0	0	0	0	0	0	0	0	0	0	0	0	0	0	131	78	85	18	36.2	925	1	15	4	0	4	0	0	1	9	20	159	4.22	115.29	13.71	1.11	0.486	86	106	18.17	35.43
0	79	27.34	1	0	0	0	1	0	0	0	1	0	0	1	0	0	1	0	0	0	0	0	0	158	89	70	18	36.4	1096	1	15	2	0	2	0	0	0	4	14	99	3.72	185	4.78	2.68	0.309	19	37	9.1	28.1
1	77	22.66	1	0	0	0	0	0	0	0	1	0	1	0	0	0	0	0	0	0	1	0	0	106	65	78	19	36.4	50	1	15	4	0	4	1	0	2	11	21	105	3.225	245.5	15.12	1.02	0.323	55	94	23.13	35.7
0	63	25.71	0	0	0	0	0	0	0	0	0	0	0	0	0	0	0	0	0	0	1	0	0	103	73	86	31	36.9	1950	3	8	4	3	4	1	0	2	14	12	131	3.374	34.2	6.992	0.276	0.401	182	283	26.07	27.43
0	22	23.66	0	0	0	1	0	0	0	0	0	0	0	0	0	0	0	1	0	0	0	0	0	103	77	109	18	37.1	350	1	15	0	0	3	2	1	1	7	19	128	4.16	116.75	11.43	0.495	0.391	353	338	38.8	33.1
1	33	20.83	0	0	0	0	0	0	0	0	0	0	0	0	0	0	0	0	0	0	0	0	0	91	69	149	16	36.8	750	1	15	0	0	2	2	0	0	4	3	181	5.07	240	5.24	1.33	0.554	86	30	25.03	37.9
0	72	23.44	0	0	0	0	0	0	0	0	0	0	0	0	0	0	0	0	0	0	0	0	0	97	59	133	22	38.6	830	4	11	4	0	2	1	2	0	9	20	123	3.175	72.67	7.95	0.325	0.376	33	33	32.9	21.7
0	70	21.11	1	0	0	0	0	0	0	0	1	0	0	0	0	0	0	0	0	0	0	0	0	113	77	80	16	36.5	1380	1	15	4	0	4	2	2	4	16	11	124	3.77	117	3.46	0.25	0.38	611	1023	34.7	32.6
1	78	17.09	1	0	0	1	0	1	0	0	1	0	0	0	0	0	0	1	0	0	0	0	0	176	78	84	18	36.1	0	1	15	3	0	2	0	0	4	9	13	67	1.644	120.4	5.784	0.432	0.204	4	10	9.1	33.9
0	63	20.08	0	0	0	0	0	0	0	0	0	0	0	0	0	0	0	0	0	0	1	0	0	136	78	64	20	37.7	700	1	15	4	0	2	0	0	0	6	14	133	4.34	254	7.95	1.32	0.392	24	31	23.9	41
1	74	24.46	1	0	0	0	0	0	0	0	1	0	0	0	0	0	0	0	0	0	0	0	0	134	65	71	22	38	590	1	15	2	0	2	2	0	0	6	7	129	3.67	194	4.98	0.74	0.395	356	686	39.37	32.3
1	61	16.65	0	0	0	0	0	0	0	0	0	0	1	0	0	0	0	0	0	0	0	0	0	91	65	120	18	38.3	2300	1	15	4	0	4	2	0	2	12	16	46	2.22	154	10.75	0.89	0.112	10	23	18.9	22.3
0	76	17.96	1	1	0	0	0	0	0	0	1	0	0	0	0	0	0	0	0	1	0	0	0	84	56	100	29	38.3	285	1	15	4	0	3	2	0	3	12	17	101	3.9	138.83	17.36	0.61	0.311	15	16	38.63	26.8
0	92	17.96	1	1	1	0	0	0	0	0	1	1	0	0	0	0	0	0	0	1	1	0	0	142	73	135	24	38.2	340	2	14	2	1	2	1	0	1	7	21	124	3.95	186.8	15.862	0.322	0.379	9	26	15.87	27.3
0	64	15.78	1	0	0	0	0	0	0	0	1	0	1	0	0	0	0	0	0	0	0	0	0	127	71	93	18	36.7	1600	1	15	0	0	1	2	2	2	7	11	72	2.032	169.2	36.43	1.166	0.22	30	53	57.57	34.7
1	73	19.31	0	0	0	0	0	0	0	0	0	0	0	0	0	0	0	0	0	0	0	0	0	194	62	98	18	38.2	500	1	15	4	0	2	0	0	0	6	12	110	3.48	177.33	7.66	1.37	0.336	10	18	16	27
1	72	29.14	1	0	1	1	1	0	0	0	1	1	0	1	0	0	0	0	0	1	0	0	0	154	77	87	15	37.8	1050	1	15	2	1	2	0	0	0	5	19	173	5.51	111	7.28	0.16	0.531	11	14	12.6	27.3
0	57	22.86	1	0	0	0	0	0	0	0	1	0	0	0	0	0	0	0	0	0	1	0	0	164	96	104	19	38.4	700	3	8	4	4	2	0	0	0	10	20	159	5.04	342	7.13	0.78	0.464	15	13	11.6	38.2
1	54	25.56	1	0	1	0	0	0	0	0	1	1	0	0	0	0	0	0	0	0	0	0	0	149	72	73	16	38	1400	1	15	1	0	2	1	0	0	4	8	112	3.51	178	9.11	1.08	0.343	18	17	8.97	28.53
1	55	24.41	1	0	1	0	0	0	1	0	1	1	0	0	0	0	0	0	0	0	1	0	0	178	79	114	34	36.1	920	3	4	2	4	2	3	2	2	15	36	88	2.36	152.25	2.75	3.98	0.27	215	265	143.95	22.1
0	62	23.03	1	0	0	0	0	0	1	0	1	0	0	0	0	0	1	1	0	0	1	0	0	152	78	93	18	36.8	650	1	15	4	0	2	0	0	2	8	23	73	2.6	271.75	18.08	0.52	0.225	16	14	15.9	26.4
0	60	19.03	0	0	1	0	0	0	0	0	0	1	0	0	0	0	0	0	0	0	0	0	0	97	54	100	20	36.8	940	1	15	3	0	3	1	0	2	9	16	76	2.835	91.5	7.595	0.64	0.234	8	9	17.2	22
0	31	23.39	0	0	0	0	0	0	0	0	0	0	0	0	0	0	0	0	0	0	0	0	0	199	140	110	20	37.4	680	1	15	2	0	2	1	0	0	5	3	117	3.66	66.8	12.51	0.592	0.359	13	24	24	29.1
0	60	16.51	1	0	0	0	0	0	0	0	1	0	0	0	0	0	0	0	0	0	1	0	0	104	40	77	15	36.7	680	1	15	0	1	2	0	0	0	3	3	88	2.97	173.33	16.55	0.63	0.269	6	66	13.75	29.9
0	64	22.86	1	0	1	0	1	0	0	0	1	1	0	0	0	0	0	0	0	0	0	0	0	157	73	88	16	36.3	1250	1	15	0	0	2	0	0	4	6	16	98.22	3.6	265.25	11.48	0.76	0.3	30.67	10	6.87	27.47
0	65	14.88	0	0	0	0	0	0	0	0	0	0	1	0	0	0	0	0	0	0	1	0	0	108	83	108	19	36.4	370	3	3	4	4	3	1	0	2	14	24	128	3.81	143	7.72	0.26	0.392	17	39	13.97	23.6
0	71	21.26	0	0	0	0	0	0	0	0	0	0	1	0	0	0	0	0	0	0	1	0	1	155	69	93	20	36.8	1530	1	15	4	1	1	1	1	1	9	17	123	3.95	257	15.06	0.46	0.369	42	42	11.8	27
1	64	24.44	0	0	1	0	0	0	0	0	0	1	0	0	0	0	0	0	0	0	0	0	0	127	91	110	20	39.4	3940	1	15	2	0	4	0	0	2	8	13	101	2.82	287	6.43	1.13	0.309	16	16	16.2	28.3
1	81	28.01	1	0	0	0	0	0	0	0	1	0	0	0	0	0	0	0	0	0	1	0	0	63	45	110	18	37	4050	2	14	2	0	2	4	1	0	9	22	111	3.66	107.25	32.01	1.15	0.34	22.33	55	39.1	38.47
1	73	23.44	1	0	0	0	1	0	0	0	1	0	0	0	0	0	1	0	0	0	1	0	0	94	46	77	17	37.1	1920	2	14	3	0	0	4	0	0	7	22	64	2.02	532	15.78	1.37	0.192	30	29.67	17.6	35.2
1	82	24.46	0	0	0	0	0	0	0	0	0	0	1	0	0	0	1	0	0	0	0	0	0	85	45	136	21	39	1050	1	15	4	1	4	4	0	3	16	19	82	2.78	255.4	11.21	1.62	0.252	104.75	366	331.5	36.275
0	60	21.71	0	0	0	0	1	0	0	0	0	0	0	0	0	0	1	0	0	0	0	0	0	113	66	54	18	37.4	1050	1	15	4	0	3	3	2	0	12	14	123	3.64	143.43	16.26	0.49	0.378	3945.5	13110	76.1	31.3
0	72	27.43	1	1	0	0	0	0	0	0	1	0	0	0	0	0	0	0	0	1	0	0	0	123	70	84	15	37.3	400	1	15	4	0	3	0	0	0	7	17	137	4.69	105.5	5.605	0.21	0.419	5.67	11	15	34.7
1	83	19.53	0	0	0	0	0	0	0	0	0	0	0	0	0	0	0	0	0	0	0	0	0	116	57	132	22	36.8	980	1	15	4	0	3	0	2	4	13	12	92	3.15	57.5	6.44	0.465	0.281	15	38	13.4	19.5
0	59	21.55	0	0	0	0	0	0	0	0	1	1	0	0	0	0	0	1	0	0	1	0	0	129	82	78	18	37.1	1550	4	9	4	3	3	0	2	2	14	27	92	3.04	94.5	15.56	0.56	0.281	29.67	25	19.2	34.57
0	59	17.72	0	0	0	0	0	0	0	0	0	0	1	0	0	0	0	0	0	0	0	0	0	107	67	110	20	38.6	1810	1	15	4	0	2	0	1	0	7	15	127	3.6	141	17.15	0.78	0.388	28.5	22	10.5	29.8
0	33	24.69	0	0	0	0	0	0	0	0	0	0	0	0	0	0	0	0	0	0	0	0	0	133	88	87	27	37.6	2400	1	15	2	4	2	1	1	1	11	6	154	5.02	203	15.61	1.62	0.455	87	27	28.9	40
1	74	24.97	0	0	0	0	1	0	0	0	0	0	0	0	0	0	0	0	0	0	1	0	0	145	75	92	12	37.9	1200	3	3	3	4	3	0	0	0	10	32	70	2.41	220.5	5.69	0.605	0.214	13	23	8.8	32.5
0	69	25.31	1	0	1	0	0	0	0	0	1	1	1	0	0	0	0	0	0	0	0	0	0	168	68	101	18	36.8	1410	1	15	3	0	3	0	4	1	11	8	106	3.126	62.4	6.444	0.49	0.323	18.5	19	22.95	22.1
0	76	24.22	0	0	0	0	0	0	0	0	0	0	0	0	0	0	0	0	0	0	0	0	0	124	69	68	19	36.5	1450	1	15	4	0	3	0	2	0	9	17	118	3.61	66.5	19.42	0.16	0.362	22	18	10.1	21.2
0	83	21.56	1	0	0	0	0	0	0	0	1	0	0	0	1	0	0	0	0	1	0	0	0	135	56	62	12	36.9	500	1	15	4	0	2	0	0	0	6	13	114	3.77	101.5	4.73	0.265	0.351	96.67	51	22.27	25.67
0	84	22.85	1	0	0	0	0	0	0	0	1	0	0	0	0	0	1	1	0	0	0	0	0	113	58	108	12	36.6	2520	1	15	2	0	3	0	0	2	7	13	130	4.25	228	8.75	1.43	0.397	16.33	33	17.3	25.53
1	57	21.94	0	0	0	0	0	0	0	0	0	0	0	0	0	0	0	0	0	0	0	0	0	149	89	109	23	39.4	2250	3	3	4	4	3	0	0	0	11	21	139	4.41	150	6.36	0.635	0.425	15	11.67	9.8	31.6
0	74	25	1	0	0	0	0	0	0	0	1	0	1	0	0	0	1	0	0	0	0	0	0	106	57	92	18	37.4	1050	1	15	2	0	2	0	0	0	4	15	101	3.03	61	7.4	2.77	0.309	5.5	20	14.65	25.7
0	48	18.44	0	0	0	0	0	0	0	0	0	0	0	0	0	0	0	0	0	0	0	0	0	111	65	82	13	37.7	600	1	15	3	0	3	0	0	0	6	10	110	3.47	174	6.31	0.55	0.344	13.5	10	21.4	31.5
0	69	22.32	1	0	0	0	0	0	0	0	1	0	0	0	0	0	0	0	0	0	1	0	0	166	73	103	16	36.7	2000	1	15	3	0	3	0	0	0	6	14	91	2.69	131.5	6.205	0.615	0.278	25	30.67	15.9	27.63
0	86	22.86	0	0	0	0	0	0	0	0	0	0	0	0	0	0	0	1	0	0	0	0	0	92	62	110	14	37.1	5	3	8	4	0	4	2	0	4	14	22	122	4.19	59.5	7.65	0.38	0.373	20	34.75	47.1	30.1
0	37	30.86	0	0	0	0	0	0	0	0	0	0	0	0	0	0	0	0	0	0	1	0	0	192	96	100	23	38	1600	3	5	4	4	2	1	1	1	13	21	176	5.6	235	13.48	0.58	0.502	23	25	26.2	42.4
0	86	21.8	0	0	0	0	0	0	0	0	0	0	0	0	0	0	0	0	0	0	0	0	0	149	69	55	18	37.1	1050	3	8	3	3	3	0	0	0	9	16	117	3.98	219.5	16.365	0.37	0.358	18.5	31	12.35	32.65
0	85	18.6	0	0	0	0	0	0	0	0	0	0	0	0	0	0	0	1	0	0	0	0	0	118	64	84	12	37.1	690	3	5	3	4	3	2	2	2	16	26	111	3.87	77.67	7.22	0.35	0.34	1315	2350	32.2	1.01
0	73	28.3	1	0	0	0	1	0	0	0	1	0	0	1	0	0	0	0	0	0	0	0	0	133	62	125	32	38.3	850	1	15	3	0	3	2	2	0	10	19	147	4.11	129	8.215	0.53	0.45	44.25	67.25	27.6	26.35
1	67	17.78	0	0	0	0	0	0	0	0	0	0	0	0	0	0	0	0	0	0	0	0	0	116	75	110	20	37.7	1650	1	15	2	0	3	0	1	0	6	16	94	3.29	94.5	18.57	0.13	0.288	12.67	19.67	30.8	19.7
1	49	17.38	0	0	0	0	0	0	0	0	0	0	1	0	0	0	0	0	0	0	0	0	0	126	84	108	22	37.9	720	3	3	3	0	4	2	2	0	11	25	83	1.9	5.25	0.12	0.86	0.253	20	82.25	68.7	24.75
0	85	15.39	0	0	0	0	0	0	0	0	0	0	0	0	0	0	1	0	0	0	0	0	0	130	92	90	15	37.4	85	3	6	3	2	4	2	2	2	15	24	126	3.41	102.5	0.88	0.47	0.386	49	183.6	46.45	29.5
1	46	19.53	0	0	0	0	0	0	0	0	0	0	0	0	0	0	0	0	0	0	0	0	0	118	64	122	20	37.6	1050	1	15	3	0	0	2	2	0	7	27	64	2.41	392	30.64	1.66	0.188	52	141	61.4	27.2
1	69	16.02	0	1	0	0	0	0	0	0	0	0	0	0	0	0	0	0	0	1	0	0	0	125	79	120	24	37.5	1095	1	15	2	0	2	0	0	0	4	22	50	2.16	191	4.93	0.43	0.154	7	14	15.6	29.7
0	77	27.97	1	0	0	0	0	0	0	0	1	0	0	0	0	0	0	0	0	0	0	0	0	175	112	90	19	36.8	2520	1	15	3	0	3	1	1	0	8	11	99	2.84	101.67	10.77	0.96	0.305	14	20.25	27.65	33.65
1	54	16.02	0	0	0	0	0	0	0	0	0	0	0	0	0	0	0	0	0	0	0	0	0	92	48	72	12	36.6	590	1	15	2	0	2	1	1	1	7	12	121	4.06	194	3.23	1.73	0.363	17	16	6.5	38.8
0	77	22.49	0	1	1	0	1	0	0	0	0	1	0	1	0	0	0	0	0	0	0	0	0	127	64	148	20	38.3	410	3	3	4	0	2	0	0	3	9	47	124	3.73	131.33	11.28	0.58	0.38	42	58	10.2	30.7
1	56	23.05	1	0	1	0	0	0	0	0	1	1	0	0	0	0	0	0	0	0	0	0	0	176	105	108	20	38	900	1	15	0	0	2	0	0	0	2	10	148	3.91	369	19.75	0.99	0.454	24	33	17.15	29.95
0	72	23.14	0	0	0	0	0	0	0	0	0	0	0	0	0	0	0	0	0	0	0	0	0	134	60	97	33	37.5	770	3	4	1	0	1	0	0	0	2	22	123	3.91	287.5	19.35	0.61	0.377	49.5	36.67	19.65	24.3
0	75	17.72	1	0	1	0	0	0	0	0	1	1	0	0	0	0	0	1	0	0	0	0	0	123	62	77	16	36.2	2630	1	15	2	0	4	0	0	4	10	20	116	3.48	173	6.7	0.12	0.335	16	50	12.4	14.3
0	54	28.6	1	0	0	0	0	0	0	0	1	0	0	0	0	0	0	0	0	0	1	0	0	146	80	117	27	36.9	1520	3	8	3	3	4	0	0	0	10	19	135	4.25	317	14.23	1.05	0.415	136	75	13.2	45
0	53	29.38	1	0	0	0	0	0	0	0	1	0	0	0	0	0	0	0	0	0	1	0	0	132	93	57	17	36.8	1300	3	3	4	3	3	0	0	0	10	20	131	4.05	202	5.95	1.24	0.376	41	39	17.7	40
1	53	22.9	0	0	0	0	0	0	0	0	0	0	1	0	0	0	0	0	0	0	0	0	0	107	59	109	18	37.7	2115	1	15	4	0	2	0	2	0	8	15	63	1.98	87	1.3	1.16	0.185	10	17	7.2	28.8
0	64	23.31	0	0	0	0	0	0	0	0	0	0	0	0	0	0	0	0	0	0	0	0	0	96	50	120	22	38.2	1270	1	15	4	0	4	2	4	4	18	33	50	1.58	8	0.37	5.55	0.148	25	27	17.6	41.2
1	18	24.5	0	0	0	0	0	0	0	0	0	0	0	0	0	0	0	0	0	0	0	0	0	130	72	130	22	38.2	600	1	15	4	1	1	0	0	0	6	5	94	3.22	115	8.88	1.94	0.285	12	26	7.7	34.5
1	66	25.81	0	0	0	0	0	0	0	0	0	0	0	0	0	0	0	0	0	0	0	0	0	139	99	125	25	37.8	430	1	15	4	0	4	2	2	2	14	19	133	4.16	206	13.55	1.39	0.4	84	171	30.4	35.2
0	69	24.22	1	0	1	1	1	0	1	0	1	1	0	0	0	0	0	1	0	0	0	0	0	108	49	75	22	37.1	2275	1	15	4	1	2	1	1	1	10	26	145	4.74	160	13.02	0.54	0.422	20	22	14.4	33.3
0	65	13.84	1	0	0	0	0	0	0	0	1	0	0	0	0	0	0	0	0	0	1	0	0	112	82	125	36	36.6	350	4	12	4	0	2	1	1	1	9	15	92	2.91	11	5.12	0.11	0.268	17	14	25.2	24.8
0	62	23.14	0	0	0	0	0	0	0	0	1	0	0	0	0	0	0	1	0	0	0	0	0	80	45	90	21	37.2	50	1	15	4	0	4	2	2	2	14	27	93	2.91	38	14.3	0.45	0.26	30	70	30.5	16.5
0	67	21.25	1	0	1	0	0	0	0	0	1	1	0	0	0	0	0	0	0	0	0	0	0	96	69	92	18	36.9	160	1	15	4	0	4	1	1	1	11	21	126	4.1	236	15.08	1.39	0.385	39	82	8.2	24.1
0	56	21.78	1	0	0	1	0	0	0	0	1	0	0	0	0	0	0	1	0	0	0	0	0	150	78	81	18	37	0	1	15	4	0	2	1	0	0	7	17	104	3.45	256	8.15	0.86	0.321	19	73	11.3	22.7
0	56	19.6	0	0	0	0	0	0	0	0	0	0	0	0	0	0	0	0	0	0	0	0	0	147	75	98	17	37.1	710	1	15	4	0	2	1	1	1	9	18	42	1.46	70	10.54	0.68	0.13	39	93	95.2	23.9
1	86	18.31	0	0	0	0	0	0	1	0	0	0	1	0	0	0	0	0	0	0	1	0	0	89	42	61	14	36.3	452	4	10	4	0	2	1	1	1	9	20	99	3.58	300	23.16	0.76	0.31	7	18	15.5	34.3
0	65	22.32	1	0	1	1	1	0	1	0	1	1	0	1	0	0	0	1	0	0	0	0	0	132	57	84	18	36	1500	1	15	4	0	1	1	1	1	8	7	74	2.62	139	3.66	0.98	0.235	1	18	12.3	34.5
0	72	27.04	0	0	0	0	0	0	0	0	0	0	0	0	0	0	0	0	0	0	0	0	0	92	58	80	20	38.3	430	1	15	4	0	1	1	1	1	8	7	121	3.74	184	7.51	0.96	0.23	21	16	10.9	29.9
1	79	18.73	0	0	0	0	0	0	0	0	0	0	0	0	0	0	0	0	0	0	1	0	0	143	71	87	17	36	1625	3	6	4	4	2	1	1	1	13	11	70	2.11	53	3.63	0.54	0.204	12	34	9.4	29.4
0	36	23.31	0	0	0	0	0	0	0	0	0	0	0	0	0	0	0	0	0	0	0	0	0	138	76	129	35	36.9	1060	1	15	4	0	2	1	1	1	9	6	162	5.17	265	16.29	1.32	0.475	18	18	12.3	43.9
0	73	24.97	1	0	0	0	0	0	0	0	1	0	0	0	0	0	0	0	0	0	0	0	0	87	65	116	20	38.4	780	1	15	4	0	2	1	1	1	9	7	140	4.29	171	1.88	0.51	0.417	39	182	17	30
1	72	22.48	1	0	1	0	0	0	0	0	1	1	0	0	0	0	1	0	0	0	1	0	0	112	58	100	20	36.4	10	3	6	4	4	2	2	2	4	18	25	92	3.06	140	2.75	0.46	0.288	7	10	9.8	34.2
0	82	20.5	1	0	0	0	0	0	0	0	1	0	0	0	0	0	0	0	0	1	0	0	0	115	68	117	32	38.4	80	3	3	4	4	4	2	2	4	20	28	139	4.28	169	2	0	0.381	103	389	43.9	24.8
1	43	16.89	0	0	0	0	0	0	0	0	0	0	0	0	0	0	0	0	0	0	0	0	0	102	50	102	12	39.7	1475	3	5	4	3	2	1	2	2	14	25	103	3.24	86	9.93	0.27	0.306	12	29	7	26.5
1	65	25.39	0	0	0	0	0	0	0	0	0	0	0	0	0	0	0	0	0	0	0	0	0	148	73	83	15	37.4	360	3	6	2	3	2	1	1	1	10	21	93	3.02	36	9.89	4.23	0.278	1980	2400	27.4	26.1
0	56	20.47	0	0	0	0	1	0	1	0	0	0	0	1	0	0	0	0	0	0	0	0	0	116	74	84	24	36.6	850	1	15	2	0	2	1	1	1	7	14	122	4.04	299	6.81	0.8	0.351	66	61	20.8	34.6
1	32	26.17	0	0	0	0	0	0	0	0	0	0	0	0	0	0	0	0	0	0	0	0	0	179	128	80	24	36	20	3	3	4	4	2	2	2	2	16	29	75	2.49	224	22.5	2.01	0.234	1740	4380	30.6	20.2
0	33	33.66	1	0	0	0	0	0	0	0	1	0	0	0	0	0	0	0	0	0	1	0	0	110	61	67	18	36.8	840	4	9	4	3	2	1	1	1	12	21	135	4.58	265	8.35	2.39	0.398	41	39	17.3	39.1
0	66	17.82	0	0	1	0	0	0	0	0	0	1	0	0	0	0	0	0	0	0	0	0	0	89	64	89	20	36.7	630	1	15	4	0	2	1	1	1	9	7	110	3.58	282	10.64	1.28	0.34	11	15	8.9	26.5
0	67	23.13	1	0	1	0	1	0	1	0	1	1	0	1	0	0	0	0	0	0	0	0	0	130	75	109	20	36.7	795	1	15	4	0	2	1	1	1	9	16	119	3.64	178	6.33	0.77	0.345	22	31	11.3	27.6
0	31	24.68	0	0	0	0	0	0	0	0	0	0	0	0	0	0	0	1	0	0	0	0	0	115	82	82	20	36.8	1040	1	15	4	0	2	2	2	2	12	9	113	3.54	184	6.23	0.22	0.316	34	53	14.4	23.2
0	68	23.12	1	0	1	0	0	0	0	0	1	1	0	0	0	0	0	0	0	0	1	0	0	93	55	107	12	37.2	346	1	15	4	0	2	1	1	1	9	28	89	2.98	39	10.3	0.42	0.283	15	16	18.5	25.2
1	78	19.56	1	0	0	0	0	0	0	0	1	0	0	0	0	0	0	0	0	0	0	0	0	96	78	102	22	37.7	260	1	15	4	0	4	2	2	2	14	19	120	4.27	187	19.89	1.22	0.362	18	29	29.5	23.6
0	48	30.78	0	0	0	0	0	0	0	0	0	0	0	0	0	0	0	0	0	0	0	0	0	142	111	122	26	37.1	585	1	15	4	0	4	2	4	4	18	19	135	4.44	104	15.3	0.49	0.404	44	29	22.1	28.5
1	67	16.89	1	0	1	0	0	0	0	0	1	1	0	0	0	0	0	0	0	0	0	0	0	99	66	133	20	37.4	218	1	15	4	0	4	2	2	4	16	22	129	4.37	26	1.04	0.09	0.38	38	82	35.1	19.8
1	56	17.9	0	0	0	0	0	0	0	0	0	0	0	0	0	0	0	0	0	0	0	0	0	104	72	108	26	36.6	1590	1	15	4	0	2	1	1	1	9	21	126	4.21	56	3.08	0.06	0.361	32	75	12.3	19
1	68	24.77	1	0	0	0	0	0	0	0	1	0	0	0	0	0	0	0	0	0	0	0	1	118	62	75	18	36.6	70	1	15	2	0	2	2	2	4	12	24	127	4.06	168	11.43	0.87	0.369	80	142	39.1	33.1
1	58	17.84	0	0	0	0	0	0	0	0	0	0	0	0	0	0	0	0	0	0	0	0	0	128	69	89	13	39.2	1065	4	11	4	0	2	1	0	0	7	19	101	3.44	194	8.83	0.61	0.31	44	77	12.9	26.7
1	42	22.76	0	0	0	0	0	1	0	0	0	0	0	0	0	0	0	0	0	0	0	0	0	98	61	78	18	36.5	2122	1	15	1	0	4	2	2	2	11	24	99	3.29	180	30.94	1.04	0.289	26	25	11.1	30.6
0	55	27.7	0	0	0	0	0	0	0	0	0	0	0	0	0	0	0	0	0	0	0	0	0	133	76	79	19	36.9	600	1	15	4	0	2	1	1	1	9	17	152	4.72	229	21.77	1.36	0.455	26	21	15.6	33.5
1	55	23.56	0	0	0	0	0	0	0	0	0	0	0	0	0	0	0	0	0	0	0	0	0	153	98	130	20	38.7	100	1	15	4	0	2	2	2	2	12	41	126	4.05	112	3.96	0.31	0.357	86	202	101.6	33.7
0	61	23.87	0	0	0	0	0	0	0	0	0	0	0	0	0	0	0	0	0	0	0	0	0	106	54	140	33	36.9	1350	3	3	4	4	4	2	2	2	18	37	110	2.93	54	2.71	0.42	0.338	77	290	21.2	26.5
0	65	24.21	1	0	1	0	0	0	0	0	1	1	0	0	0	0	0	0	0	0	0	0	0	85	50	115	30	36.4	85	1	15	4	0	4	2	4	4	18	21	133	4.34	28	14.43	0.76	0.39	8	20	39.1	33.2
1	59	25	1	0	0	0	0	0	0	0	1	0	1	0	0	0	0	0	0	0	1	0	0	155	79	60	13	38	3300	3	3	4	4	2	0	0	0	10	16	96	4.21	180	12.95	0.93	0.394	16	28	16.7	40
1	58	27.34	0	0	0	0	0	0	0	0	0	0	0	0	0	0	0	0	0	0	0	0	0	141	75	90	20	37.1	1050	1	15	4	0	2	1	1	1	9	21	96	3.46	16	10.9	0.62	0.282	65	41	182	27.2
0	63	19.92	0	0	0	0	0	0	0	0	0	0	0	0	0	0	0	0	0	0	0	0	0	125	74	58	16	37.5	750	1	15	2	0	2	1	1	1	7	9	97.25	2.99	80.5	7.79	1.19	0.29	25	20	16.6	29.7
0	51	20.98	0	0	0	0	0	0	0	0	0	0	0	0	0	0	0	0	0	0	1	0	0	121	53	62	18	38.1	3100	4	10	4	4	2	0	0	0	10	24	124	3.7	116	13.23	0.39	0.356	15	19	10.9	36.9
1	46	18.5	1	0	0	0	0	0	0	0	1	0	0	0	0	0	0	0	0	0	0	0	0	202	102	66	16	36.9	1690	1	15	4	0	2	0	0	0	6	5	126	3.3	126	5.96	1.36	0.387	12	12	7.2	32
0	59	27.68	1	0	1	0	0	0	0	0	1	1	0	0	0	0	0	0	0	0	1	0	0	181	88	73	19	37.5	1520	3	3	4	4	2	1	0	0	11	20	132	3.83	142	9.01	0.765	0.404	12	18	19.8	40.9
0	86	23.39	1	0	0	0	0	0	0	0	1	0	0	0	0	0	0	0	0	0	0	0	0	136	47	76	21	37.5	400	1	15	1	0	2	0	1	1	5	8	117	3.69	131.5	3.07	0.76	0.358	13	18	18.9	28.9
0	66	24.22	0	0	0	0	0	0	0	0	0	0	0	0	0	0	0	0	0	0	0	0	0	154	70	60	20	37	600	1	15	1	0	1	0	1	1	4	7	148	4.22	207	10.02	1.68	0.453	12	19	23.9	40
0	29	31.1	1	0	0	0	0	0	0	0	1	0	0	0	1	0	0	0	0	0	0	0	0	150	110	110	19	36.7	885	1	15	2	0	1	1	1	1	6	2	154	5.48	193	16.72	0.96	0.471	24	21	10.8	37.7
0	28	20.76	0	0	0	0	0	0	0	0	0	0	0	0	0	0	0	0	0	0	0	0	0	139	65	144	22	37	3750	1	15	4	0	2	0	0	0	6	7	136	3.93	162.2	14.98	0.52	0.416	12	24	13.25	38.3
1	65	19.5	1	0	1	0	0	0	0	0	1	1	0	0	0	0	0	0	0	0	0	0	0	80	44	122	28	37.8	1480	1	15	4	0	4	4	4	4	20	15	92	3.14	99	1.8	0	0.272	12	37	16.7	26.4
0	48	30.12	0	0	0	0	0	0	0	0	0	0	0	0	0	0	0	0	0	0	0	0	0	140	86	102	18	37.2	1750	1	15	4	0	2	0	0	0	6	7	150	3.36	190	5.47	1.52	0.461	33	31	23.2	41
0	51	20.1	0	0	0	0	0	0	0	0	0	0	0	0	0	0	0	0	0	0	0	0	0	149	66	61	16	37.1	2400	1	15	4	1	1	1	1	1	9	13	140	4.78	315.67	13.17	0.78	0.428	11	22	13.53	42.67
1	70	19.11	1	0	0	0	0	1	1	0	1	0	1	0	0	0	0	0	0	0	0	0	0	106	67	106	24	37.4	600	1	15	4	0	2	1	1	1	9	14	118	3.63	123	7.23	0.58	0.349	11	27	19	32.2
0	65	19.49	0	0	0	0	0	1	0	0	0	0	0	0	0	0	0	0	0	0	0	0	0	109	64	77	13	37.7	950	1	15	4	2	1	1	2	4	14	11	65	2.42	32.6	3.74	0.36	0.199	9	18	15.25	31.4
0	54	27.68	1	0	0	0	0	0	0	0	1	0	1	0	0	0	0	0	0	0	1	0	0	104	88	86	18	36.6	1500	4	9	4	2	1	1	1	1	10	8	137	4.235	89	9.13	0.835	0.419	9	16	9.65	28.6
0	57	25.3	0	0	0	0	0	0	0	0	0	0	1	0	0	0	0	0	0	0	0	0	0	142	73	70	19	37.4	950	1	15	4	0	2	1	1	1	9	6	153	4.37	261.67	13.3	1.01	0.469	52	31	12.8	39.8
0	58	21.45	0	0	0	0	0	0	0	0	0	0	0	0	0	0	0	0	0	0	0	0	0	114	80	69	18	37.3	1520	1	15	2	0	2	2	1	1	8	10	118.45	3.8	41.75	22.18	0.88	0.36	550	624	71.63	30.87
1	61	24.4	0	0	0	0	0	0	0	0	0	0	0	0	0	0	0	0	0	0	0	0	0	135	100	117	30	38.4	620	1	15	4	0	4	2	4	4	18	11	105	3.73	27	13.4	0.48	0.318	12	19	31.9	19.9
1	66	19.35	1	0	0	1	1	0	1	0	1	0	0	1	0	0	0	1	0	0	1	0	0	106	55	71	18	36.8	750	1	15	4	0	2	1	1	1	9	12	74.7	2.43	118.6	12.16	0.51	0.224	38	36	11.4	29.6
1	58	22.22	1	0	0	0	0	0	0	0	1	0	0	0	0	0	0	0	0	0	1	0	0	145	99	107	23	37.5	2725	3	5	4	0	0	0	0	0	4	26	148	4.63	261.33	20.79	0.64	0.452	10	26	3.9	29.1
0	71	22	0	0	0	0	0	0	0	0	0	0	0	0	0	0	0	0	0	0	1	0	0	129	87	85	14	36.4	3330	3	3	4	4	2	1	1	1	13	20	134	3.84	120	18.99	0.86	0.41	25	43	15.3	29.7
0	48	25.06	0	0	0	0	0	0	0	0	0	0	0	0	0	0	0	0	0	0	0	0	0	150	98	129	19	37.7	550	3	3	2	0	1	1	1	1	6	18	133	3.85	202	6.41	0.45	0.408	19	37	12	26
1	48	31.23	1	0	0	0	0	0	0	0	1	0	0	0	0	0	0	0	0	0	0	0	0	145	69	60	17	36.8	2000	1	15	2	0	4	1	1	1	9	8	128	4.42	196	7.05	1.3	0.393	10	13	22.1	36.6
1	76	22.995	0	0	0	0	0	0	0	0	0	0	0	0	0	0	0	0	0	0	0	0	0	146	69	68	16	37.1	3740	3	7	4	4	1	0	0	0	9	16	103	3.24	169.5	11.88	1.01	0.314	35	43	13.1	31.5
0	44	21.34	1	0	1	0	0	0	0	0	1	1	0	0	0	0	0	0	0	0	1	0	0	144	79	109	23	37.3	1950	4	9	4	4	2	0	0	0	10	16	142	3.63	241	13.69	1.96	0.434	24	46	13	36.1
0	73	22.49	0	0	0	0	0	0	0	0	0	0	0	0	0	0	0	0	0	0	1	0	0	155	69	87	17	38.4	850	3	4	4	4	1	1	1	1	12	27	136	3.44	120.67	9.31	0.68	0.417	13	24	16.2	28.9
[truncated: 34 more columns]
